# Supplementary material for: Energetics and kinetics of Cu atoms and clusters on the Si(111)-7 × 7 surface: first-principles calculations
Source: Royal Society of Chemistry journal article supplement (doi:10.1039/c6cp01919f), 2016-01-01
Supplement: c6cp01919f1.pdf [file c6cp01919f1.pdf]

**Supplemental Material for**  
**Energetics and kinetics of Cu atoms and clusters on Si(111)-7×7**  
**surface: first-principles calculations**

Xiao-Yan Ren<sup>a,b</sup>, Chun-Yao Niu<sup>a,d\*</sup>, Wei-Guang Chen<sup>c</sup>, Ming-Sheng Tang<sup>e</sup>, and  
Jun-Hyung Cho<sup>b,a</sup>

<sup>a</sup>International Laboratory for Quantum Functional Materials of Henan, and School of Physics and  
Engineering, Zhengzhou University, Zhengzhou 450001, China

<sup>b</sup>Department of Physics and Research Institute for Natural Sciences, Hanyang University, 17  
Haengdang-Dong, Seongdong-Ku, Seoul 133-791, Korea

<sup>c</sup>College of Physics and Electronic Engineering, Quantum Materials Research Center,  
Zhengzhou Normal University, Zhengzhou, China

<sup>d</sup>Center for Advanced Analysis and Computational Science, Zhengzhou University,  
Zhengzhou 450001, China

<sup>e</sup>College of Chemistry and Molecular Engineering, Zhengzhou University,  
Zhengzhou, 450001, China.

**This file includes:**

**S1. The top and side views of the whole slab dimer-adatom-stacking-fault (DAS) model.**

**S2. Simulated STM image of the most stable Cu<sub>6</sub>/Si(111)-(7×7) complex versus the experimental STM pattern of Cu cluster arrays on Si(111)-(7×7) with a coverage around 0.15 ML.**

**S1. The top and side views of the whole slab dimer-adatom-stacking-fault (DAS) model.**

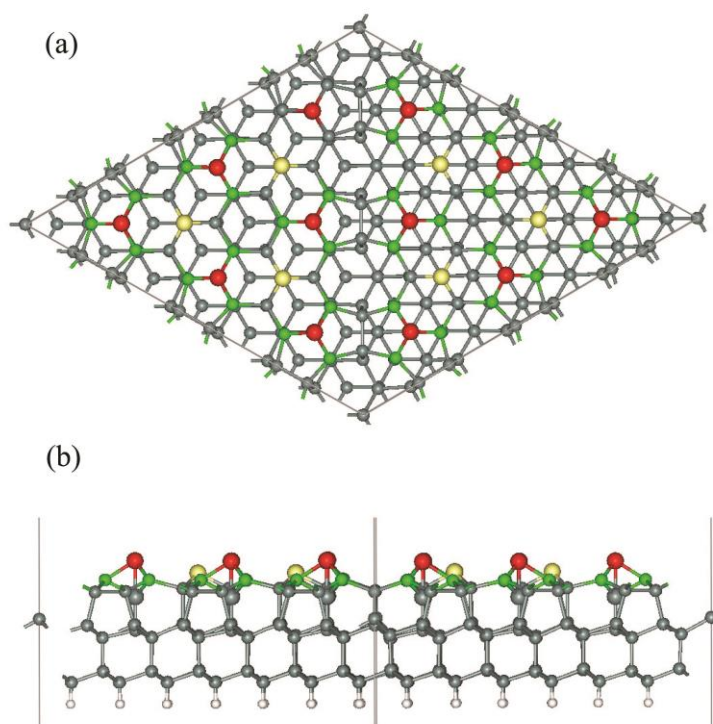

**Figure 1S:** The top (a) and the side (b) views of the whole slab dimer-adatom-stacking-fault (DAS) model. Red, yellow, green, gray and white balls represent the Si adatoms, Si rest atoms, Si backbond atoms, Si bulk atoms and H atoms, respectively.

**S2. Simulated STM image of the most stable  $\text{Cu}_6/\text{Si}(111)-(7\times 7)$  complex versus the experimental STM pattern of Cu cluster arrays on  $\text{Si}(111)-(7\times 7)$  with a coverage around 0.15 ML.**

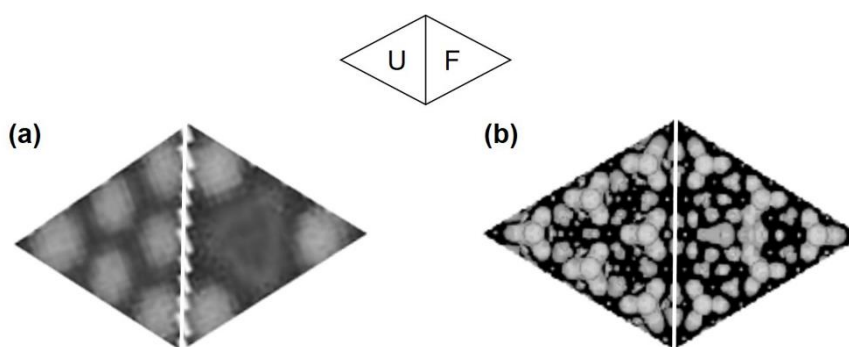

**Figure 2S:** (a) Experimental STM image of Cu cluster arrays on  $\text{Si}(111)-(7\times 7)$  with a coverage around 0.15 ML (see Ref. 13); (b) Simulated STM image of the most stable  $\text{Cu}_6/\text{Si}(111)-(7\times 7)$  configuration (see Figure 3(e)). Here, 0.5V positive bias voltage are adopted in both cases. Schematic diagram on top of the figure illustrates the location of the unfaulted (U) and faulted (F) halves within the  $7\times 7$  unit cell. The using of the experimental STM image presented here is authorized by Elsevier.
